# Supplementary material
Source: Springer Nature journal article supplement (https://www.springermedizin.de/resource/supplementary/13069_2011_107_MOESM3_ESM.pdf/9659770)

A

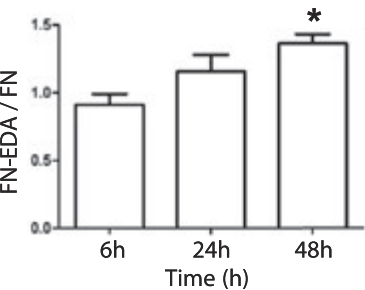

B

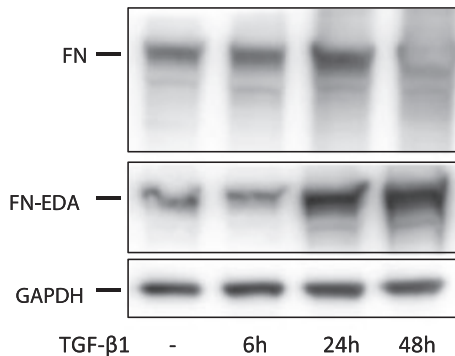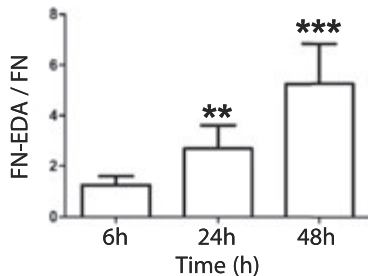

Supplement: MOESM3 [file 9659770]
